# Supplementary material
Source: PubMed Central journal article supplement (PMC6143009)
Supplement: jamaoncol-4-1214-s002.pdf [file jamaoncol-4-1214-s002.pdf]

## Supplementary Online Content

Borges VF, Ferrario C, Aucoin N, et al. Tucatinib combined with ado-trastuzumab emtansine in advanced *ERBB2/HER2*-positive breast cancer: a phase 1b clinical trial. *JAMA Oncology*. Published online June 28, 2018. doi:10.1001/jamaoncol.2018.1812

**eTable 1:** Incidence of treatment-emergent and tucatinib-related adverse events

**eTable 2:** Steady-state pharmacokinetic parameters of tucatinib

This supplementary material has been provided by the authors to give readers additional information about their work.

**eTable 1: Incidence of treatment-emergent and tucatinib-related adverse events**

| Adverse Event                                 | Regardless of Causality  |                         | Tucatinib-Related        |                         |
|-----------------------------------------------|--------------------------|-------------------------|--------------------------|-------------------------|
|                                               | 300 mg BID Dose (N = 50) | 350 mg BID Dose (N = 7) | 300 mg BID Dose (N = 50) | 350 mg BID Dose (N = 7) |
| <b>All Grades in ≥ 20% of Patients</b>        |                          |                         |                          |                         |
| Total Patient with Any AE                     | 50 (100%)                | 7 (100%)                | 46 (92%)                 | 7 (100%)                |
| Nausea                                        | 36 (72%)                 | 7 (100%)                | 27 (54%)                 | 7 (100%)                |
| Diarrhea                                      | 30 (60%)                 | 4 (57%)                 | 26 (52%)                 | 4 (57%)                 |
| Fatigue                                       | 28 (56%)                 | 5 (71%)                 | 20 (40%)                 | 5 (71%)                 |
| Epistaxis                                     | 22 (44%)                 | 4 (57%)                 | -                        | -                       |
| Headache                                      | 22 (44%)                 | 4 (57%)                 | -                        | -                       |
| Thrombocytopenia                              | 21 (42%)                 | 5 (71%)                 | -                        | -                       |
| Vomiting                                      | 21 (42%)                 | 5 (71%)                 | 16 (32%)                 | 5 (71%)                 |
| Constipation                                  | 21 (42%)                 | 2 (29%)                 | -                        | -                       |
| Decreased appetite                            | 20 (40%)                 | 3 (43%)                 | 13 (26%)                 | 3 (43%)                 |
| Hypokalemia                                   | 19 (38%)                 | 3 (43%)                 | 11 (22%)                 | 2 (29%)                 |
| Aspartate aminotransferase increased          | 19 (38%)                 | 4 (57%)                 | 16 (32%)                 | 2 (29%)                 |
| Cough                                         | 14 (28%)                 | 2 (29%)                 | -                        | -                       |
| Dyspepsia                                     | 13 (26%)                 | 0                       | -                        | -                       |
| Dry mouth                                     | 12 (24%)                 | 3 (43%)                 | -                        | -                       |
| Alanine aminotransferase increased            | 13 (26%)                 | 4 (57%)                 | 11 (22%)                 | 2 (29%)                 |
| Urinary tract infection                       | 12 (24%)                 | 1 (14%)                 | -                        | -                       |
| Dizziness                                     | 10 (20%)                 | 3 (43%)                 | -                        | -                       |
| Anemia                                        | 10 (20%)                 | 3 (43%)                 | -                        | -                       |
| Vision blurred                                | 10 (20%)                 | 2 (29%)                 | -                        | -                       |
| Hyperbilirubinemia                            | 10 (20%)                 | 1 (14%)                 | -                        | -                       |
| Blood alkaline phosphatase increased          | 10 (20%)                 | 0                       | -                        | -                       |
| <b>Grade 3 or Higher in ≥ 10% of Patients</b> |                          |                         |                          |                         |
| Total Patient with Any AE                     | 37(74%)                  | 6 (86%)                 | 26 (52%)                 | 5 (71%)                 |
| Thrombocytopenia                              | 14 (28%)                 | 3 (43%)                 | 7 (14%)                  | 1 (14%)                 |
| Hypokalemia                                   | 8 (16%)                  | 1 (14%)                 | -                        | -                       |
| Alanine aminotransferase increased            | 7 (14%)                  | 1 (14%)                 | 6 (12%)                  | 1 (14%)                 |
| Aspartate aminotransferase increased          | 7 (14%)                  | 0                       | 6 (12%)                  | 0                       |
| Fatigue                                       | 6 (12%)                  | 2 (29%)                 | -                        | -                       |
| Hypophosphataemia                             | 6 (12%)                  | 1 (14%)                 | -                        | -                       |

**eTable 2: Steady-state pharmacokinetic parameters of tucatinib**

| Cycle and Dose                                                          | Statistic     | $C_{max}$ | $T_{max}$ | $AUC_{0-6}^a$ | $AUC_{tau}^b$ | $C_{max}/Dose$ | $AUC_{0-6}/Dose^a$ | $AUC_{tau}/Dose^b$ |
|-------------------------------------------------------------------------|---------------|-----------|-----------|---------------|---------------|----------------|--------------------|--------------------|
|                                                                         |               | (ng/mL)   | (h)       | (h*ng/mL)     | (h*ng/mL)     | (ng/mL/mg)     | (h*ng/mL/mg)       | (h*ng/mL/mg)       |
| Cycle 2, 300 mg                                                         | <b>N</b>      | 27        | 27        | 27            | 12            | 27             | 27                 | 12                 |
|                                                                         | <b>Mean</b>   | 790       | NC        | 3000          | 4430          | 2.63           | 9.99               | 14.8               |
|                                                                         | <b>SD</b>     | 329       | NC        | 1030          | 1300          | 1.1            | 3.42               | 4.32               |
|                                                                         | <b>CV%</b>    | 41.6      | NC        | 34.3          | 29.3          | 41.6           | 34.3               | 29.3               |
|                                                                         | <b>Min</b>    | 311       | 0         | 1140          | 2600          | 1.04           | 3.81               | 8.67               |
|                                                                         | <b>Median</b> | 734       | 2         | 2920          | 4540          | 2.45           | 9.74               | 15.1               |
|                                                                         | <b>Max</b>    | 1590      | 6         | 5620          | 7270          | 5.3            | 18.7               | 24.2               |
| Cycle 2, 350 mg                                                         | <b>N</b>      | 5         | 5         | 5             | 2             | 5              | 5                  | 2                  |
|                                                                         | <b>Mean</b>   | 1120      | NC        | 4080          | 7120          | 3.21           | 11.7               | 20.3               |
|                                                                         | <b>SD</b>     | 525       | NC        | 1870          | NC            | 1.5            | 5.34               | NC                 |
|                                                                         | <b>CV%</b>    | 46.8      | NC        | 45.8          | NC            | 46.8           | 45.8               | NC                 |
|                                                                         | <b>Min</b>    | 541       | 1         | 1710          | NC            | 1.55           | 4.88               | NC                 |
|                                                                         | <b>Median</b> | 1250      | 1         | 5240          | 7120          | 3.57           | 15                 | 20.3               |
|                                                                         | <b>Max</b>    | 1700      | 3         | 5680          | NC            | 4.86           | 16.2               | NC                 |
| a: last time point is 6 h                                               |               |           |           |               |               |                |                    |                    |
| b: $AUC_{tau}$ is extrapolated and denotes inclusion of >20% & <40% AUC |               |           |           |               |               |                |                    |                    |
